# Supplementary material
Source: PubMed Central journal article supplement (PMC5548968)
Supplement: NIHMS885843-supplement-Supplemental_Table__Figures_and_Figure_Legends.pdf [file NIHMS885843-supplement-Supplemental_Table__Figures_and_Figure_Legends.pdf]

**Supplementary Table S1. Kinase selectivity of acalabrutinib as assessed by DiscoverRX KinomeScan screening.**

| Ambit Gene Symbol | Percent of Control Binding | Ambit Gene Symbol | Percent of Control Binding |
|-------------------|----------------------------|-------------------|----------------------------|
| AAK1              | 86                         | BMPR2             | 100                        |
| ABL1              | 100                        | <b>BMX</b>        | <b>34</b>                  |
| ABL1(E255K)       | 89                         | BRAF              | 64                         |
| ABL1(F317I)       | 100                        | BRAF(V600E)       | 44                         |
| ABL1(F317L)       | 100                        | BRK               | 79                         |
| ABL1(H396P)       | 100                        | BRSK1             | 97                         |
| ABL1(M351T)       | 100                        | BRSK2             | 100                        |
| ABL1(Q252H)       | 100                        | <b>BTK</b>        | <b>0.05</b>                |
| ABL1(T315I)       | 100                        | CAMK1             | 87                         |
| ABL1(Y253F)       | 100                        | CAMK1D            | 98                         |
| ABL2              | 97                         | CAMK1G            | 95                         |
| ACVR1             | 100                        | CAMK2A            | 90                         |
| ACVR1B            | 96                         | CAMK2B            | 92                         |
| ACVR2A            | 99                         | CAMK2D            | 89                         |
| ACVR2B            | 96                         | CAMK2G            | 84                         |
| ACVRL1            | 76                         | CAMK4             | 91                         |
| ADCK3             | 95                         | CAMKK1            | 89                         |
| ADCK4             | 88                         | CAMKK2            | 93                         |
| AKT1              | 93                         | CDC2L1            | 100                        |
| AKT2              | 100                        | CDC2L2            | 100                        |
| AKT3              | 92                         | CDK11             | 92                         |
| ALK               | 100                        | CDK2              | 82                         |
| AMPK- $\alpha$ 1  | 86                         | CDK3              | 97                         |
| AMPK- $\alpha$ 2  | 84                         | CDK5              | 100                        |
| ANKK1             | 96                         | CDK7              | 74                         |
| ARK5              | 99                         | CDK8              | 99                         |
| ASK1              | 73                         | CDK9              | 87                         |
| ASK2              | 99                         | CDKL2             | 100                        |
| AURKA             | 100                        | CDKL3             | 100                        |
| AURKB             | 100                        | CDKL5             | 100                        |
| AURKC             | 100                        | CHEK1             | 100                        |
| AXL               | 100                        | CHEK2             | 94                         |
| BIKE              | 100                        | CIT               | 100                        |
| <b>BLK</b>        | <b>61</b>                  | CLK1              | 94                         |

|                           |           |              |            |
|---------------------------|-----------|--------------|------------|
| BMPR1A                    | 100       | CLK2         | 94         |
| BMPR1B                    | 100       | CLK3         | 98         |
| CLK4                      | 100       | EPHA1        | 76         |
| CSF1R                     | 84        | EPHA2        | 91         |
| CSK                       | 86        | EPHA3        | 100        |
| CSNK1A1L                  | 92        | EPHA4        | 100        |
| CSNK1D                    | 92        | EPHA5        | 100        |
| CSNK1E                    | 90        | EPHA6        | 100        |
| CSNK1G1                   | 78        | EPHA7        | 94         |
| CSNK1G2                   | 82        | EPHA8        | 91         |
| CSNK1G3                   | 100       | EPHB1        | 100        |
| CSNK2A1                   | 54        | EPHB2        | 69         |
| CSNK2A2                   | 100       | EPHB3        | 98         |
| CTK                       | 100       | EPHB4        | 100        |
| DAPK1                     | 100       | EPHB6        | 96         |
| DAPK2                     | 80        | <b>ERBB2</b> | <b>2.1</b> |
| DAPK3                     | 99        | ERBB3        | 95         |
| DCAMKL1                   | 100       | <b>ERBB4</b> | <b>4.3</b> |
| DCAMKL2                   | 100       | ERK1         | 97         |
| DCAMKL3                   | 99        | ERK2         | 97         |
| DDR1                      | 100       | ERK3         | 94         |
| DDR2                      | 100       | ERK4         | 89         |
| DLK                       | 95        | ERK5         | 100        |
| DMPK                      | 99        | ERK8         | 99         |
| DMPK2                     | 95        | ERN1         | 85         |
| DRAK1                     | 87        | FAK          | 96         |
| DRAK2                     | 88        | FER          | 100        |
| DYRK1A                    | 100       | FES          | 100        |
| DYRK1B                    | 93        | FGFR1        | 100        |
| DYRK2                     | 98        | FGFR2        | 99         |
| <b>EGFR</b>               | <b>75</b> | FGFR3        | 87         |
| EGFR(E746-A750DEL)        | 85        | FGFR3(G697C) | 77         |
| EGFR(G719C)               | 97        | FGFR4        | 100        |
| EGFR(G719S)               | 100       | FGR          | 100        |
| EGFR(L747-E749DEL, A750P) | 87        | FLT1         | 100        |
| EGFR(L747-S752DEL, P753S) | 100       | FLT3         | 100        |
| EGFR(L747-T751DEL, SINS)  | 89        | FLT3(D835H)  | 86         |
| EGFR(L858R)               | 94        | FLT3(D835Y)  | 100        |
| EGFR(L858R, T790M)        | 94        | FLT3(ITD)    | 100        |

|                        |           |                  |     |
|------------------------|-----------|------------------|-----|
| EGFR(L861Q)            | 84        | FLT3(K663Q)      | 100 |
| EGFR(S752-I759DEL)     | 95        | FLT3(N841I)      | 95  |
| FLT4                   | 98        | KIT(V559D,V654A) | 100 |
| FRK                    | 59        | LATS1            | 93  |
| FYN                    | 100       | LATS2            | 96  |
| GAK                    | 100       | LCK              | 90  |
| GCN2(S808G)            | 90        | LIMK1            | 13  |
| GRK1                   | 100       | LIMK2            | 98  |
| GRK4                   | 100       | LKB1             | 100 |
| GRK7                   | 100       | LOK              | 73  |
| GSK3A                  | 100       | LTK              | 86  |
| GSK3B                  | 100       | LYN              | 82  |
| HCK                    | 62        | LZK              | 83  |
| HIPK1                  | 90        | MAK              | 90  |
| HIPK2                  | 99        | MAP3K1           | 100 |
| HIPK3                  | 100       | MAP3K15          | 100 |
| HIPK4                  | 88        | MAP3K2           | 100 |
| HPK1                   | 89        | MAP3K3           | 100 |
| HUNK                   | 100       | MAP3K4           | 86  |
| ICK                    | 100       | MAP4K2           | 100 |
| IGF1R                  | 98        | MAP4K3           | 99  |
| IKK- $\alpha$          | 100       | MAP4K4           | 97  |
| IKK- $\beta$           | 100       | MAP4K5           | 99  |
| IKK- $\epsilon$        | 100       | MAPKAPK2         | 100 |
| INSR                   | 100       | MAPKAPK5         | 100 |
| INSRR                  | 99        | MARK1            | 100 |
| IRAK1                  | 100       | MARK2            | 59  |
| IRAK3                  | 100       | MARK3            | 82  |
| <b>ITK</b>             | <b>96</b> | MARK4            | 100 |
| JAK1(JH1domain)        | 100       | MAST1            | 100 |
| JAK1(JH2domain)        | 71        | MEK1             | 100 |
| JAK2(JH1domain)        | 81        | MEK2             | 82  |
| <b>JAK3(JH1domain)</b> | <b>97</b> | MEK3             | 97  |
| JNK1                   | 98        | MEK4             | 100 |
| JNK2                   | 98        | MEK6             | 98  |
| JNK3                   | 100       | MELK             | 76  |
| KIT                    | 84        | MERTK            | 77  |
| KIT(D816V)             | 83        | MET              | 91  |
| KIT(L576P)             | 63        | MET(M1250T)      | 90  |

|                  |     |                |     |
|------------------|-----|----------------|-----|
| KIT(V559D)       | 53  | MET(Y1235D)    | 100 |
| KIT(V559D,T670I) | 55  | MINK           | 100 |
| MKNK1            | 99  | PAK7           | 100 |
| MKNK2            | 100 | PCTK1          | 100 |
| MLCK             | 99  | PCTK2          | 100 |
| MLK1             | 89  | PCTK3          | 100 |
| MLK2             | 100 | PDGFRA         | 100 |
| MLK3             | 94  | PDGFRB         | 95  |
| MRCKA            | 98  | PDPK1          | 67  |
| MRCKB            | 98  | PFTAIRE2       | 76  |
| MST1             | 87  | PFTK1          | 100 |
| MST1R            | 89  | PHKG1          | 100 |
| MST2             | 65  | PHKG2          | 92  |
| MST3             | 100 | PI3KCA         | 100 |
| MST4             | 91  | PI3KCB         | 100 |
| MTOR             | 100 | PI3KCD         | 100 |
| MYLK             | 100 | PI3KCG         | 100 |
| MYLK2            | 89  | PIK4CB         | 100 |
| MYO3A            | 100 | PIM1           | 84  |
| MYO3B            | 99  | PIM2           | 79  |
| NDR1             | 98  | PIM3           | 84  |
| NDR2             | 100 | PIP5K1A        | 92  |
| NEK1             | 97  | PIP5K2B        | 100 |
| NEK2             | 100 | PKAC- $\alpha$ | 77  |
| NEK5             | 95  | PKAC- $\beta$  | 88  |
| NEK6             | 100 | PKMYT1         | 100 |
| NEK7             | 80  | PKN1           | 94  |
| NEK9             | 73  | PKN2           | 86  |
| NIM1             | 100 | PLK1           | 100 |
| NLK              | 100 | PLK2           | 95  |
| OSR1             | 100 | PLK3           | 100 |
| p38- $\alpha$    | 84  | PLK4           | 80  |
| p38- $\beta$     | 98  | PRKCD          | 100 |
| p38- $\delta$    | 57  | PRKCE          | 100 |
| p38- $\gamma$    | 100 | PRKCH          | 87  |
| PAK1             | 87  | PRKCQ          | 100 |
| PAK2             | 78  | PRKD1          | 97  |
| PAK3             | 73  | PRKD2          | 100 |
| PAK4             | 88  | PRKD3          | 100 |

|            |     |                 |            |
|------------|-----|-----------------|------------|
| PAK5       | 100 | PRKG1           | 70         |
| PAK6       | 94  | PRKG2           | 95         |
| PRKR       | 92  | STK35           | 100        |
| PRKX       | 100 | STK36           | 100        |
| PRP4       | 86  | STK39           | 100        |
| PYK2       | 95  | SYK             | 100        |
| QSK        | 100 | TAK1            | 100        |
| RAF1       | 77  | TAO1            | 100        |
| RET        | 100 | TAOK1           | 100        |
| RET(M918T) | 71  | TAOK3           | 100        |
| RET(V804L) | 93  | TBK1            | 100        |
| RET(V804M) | 100 | <b>TEC</b>      | <b>6.4</b> |
| RIOK1      | 92  | TESK1           | 83         |
| RIOK2      | 80  | TGFBR1          | 92         |
| RIOK3      | 100 | TGFBR2          | 96         |
| RIPK1      | 100 | TIE1            | 89         |
| RIPK2      | 60  | TIE2            | 98         |
| RIPK4      | 100 | TLK1            | 100        |
| ROCK1      | 100 | TLK2            | 98         |
| ROCK2      | 100 | TNIK            | 82         |
| ROS1       | 100 | TNK1            | 90         |
| RPS6KA1    | 100 | TNK2            | 93         |
| RPS6KA2    | 100 | TNNI3K          | 38         |
| RPS6KA3    | 100 | TRKA            | 100        |
| RPS6KA4    | 90  | TRKB            | 100        |
| RPS6KA5    | 84  | TRKC            | 99         |
| S6K1       | 100 | TSSK1B          | 100        |
| SBK1       | 100 | TTK             | 91         |
| SGK        | 100 | <b>TXK</b>      | <b>24</b>  |
| SgK110     | 90  | TYK2(JH1domain) | 97         |
| SIK        | 88  | TYK2(JH2domain) | 100        |
| SIK2       | 100 | TYRO3           | 100        |
| SLK        | 100 | ULK1            | 100        |
| SNARK      | 100 | ULK2            | 100        |
| SRC        | 78  | ULK3            | 99         |
| SRMS       | 67  | VEGFR2          | 100        |
| SRPK1      | 67  | WEE1            | 100        |
| SRPK2      | 85  | WEE2            | 95         |
| SRPK3      | 93  | YANK2           | 59         |

|       |    |       |     |
|-------|----|-------|-----|
| STK16 | 89 | YANK3 | 100 |
| STK33 | 73 | YES   | 83  |
| YSK1  | 92 | ZAK   | 84  |
| YSK4  | 90 | ZAP70 | 98  |

Acalabrutinib was screened at 1  $\mu$ M in ATP site-dependent competition binding assays by contract with DiscoverRX (Ambit Biosciences; San Diego, CA).<sup>1</sup> The results for the primary screen binding interactions are reported as ‘% of control binding’, where lower numbers indicate stronger hits in the matrix. Values of >35% are considered ‘no hits’. BTK had the lowest percentage of control binding at 0.05% indicating a high probability of a potent interaction. 353 kinases were assessed in the screen. Kinases in bold contain a conserved cysteine residue that aligns with the Cys481 in BTK.

Supplemental reference:

- 1) Fabian M. A., et al. (2005) A small molecule-kinase interaction map for clinical kinase inhibitors. *Nat. Biotechnol.* 23, 329–336

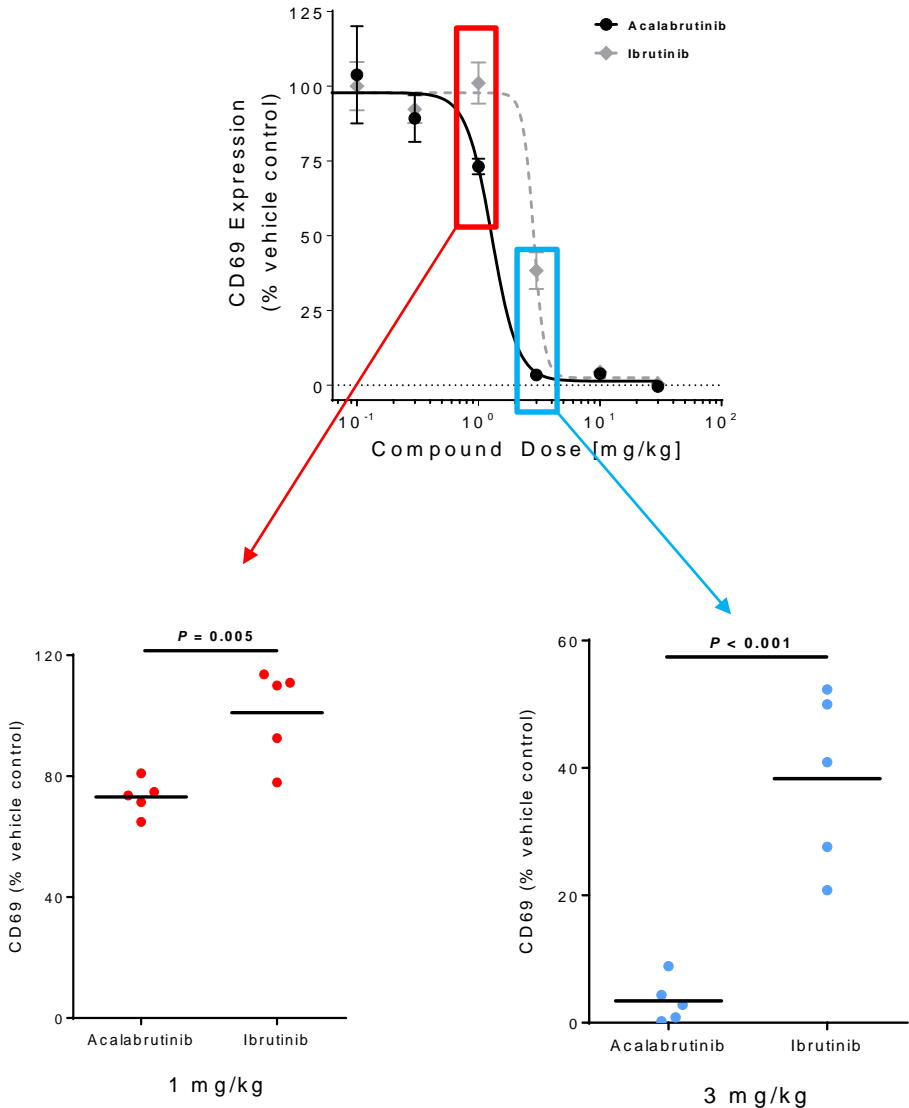

# Supplementary Figure S2

Single Dose  
(25 mg/kg, po)

3h, 6h, 12h,  
18h, 24h

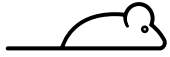

Remove  
Spleen

anti-IgM  
stimulation

Staining / flow cytometry

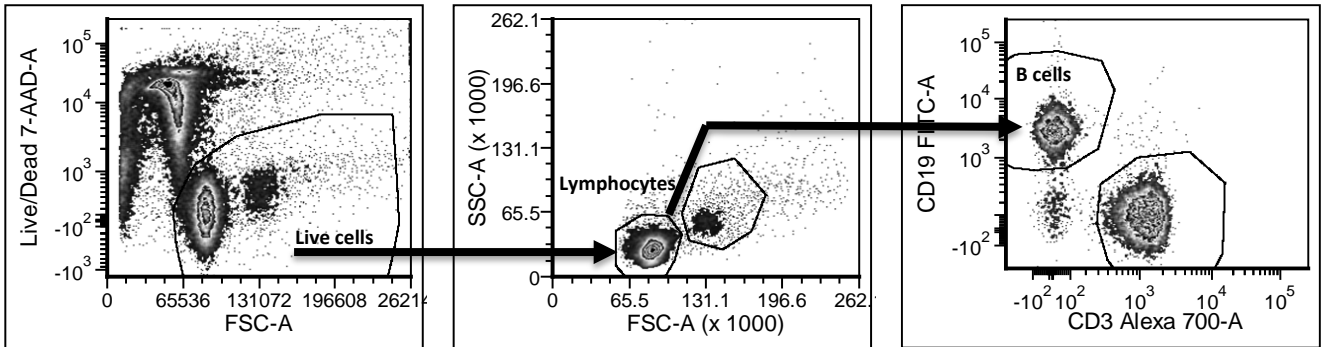

Gated on B cells

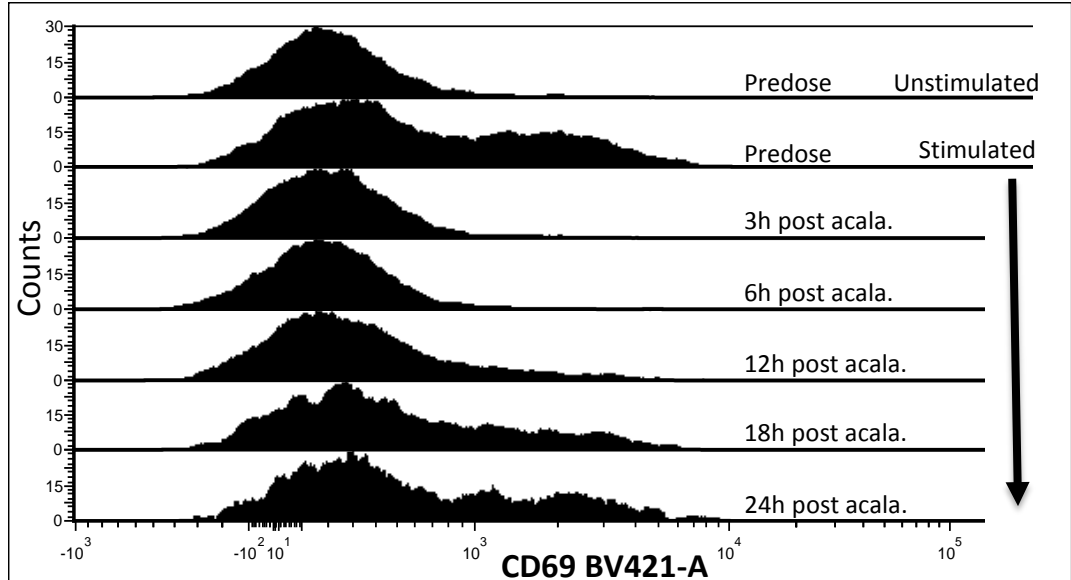



A

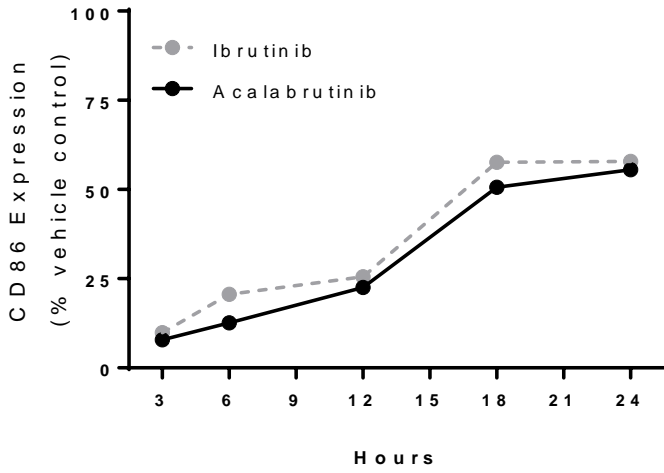

B

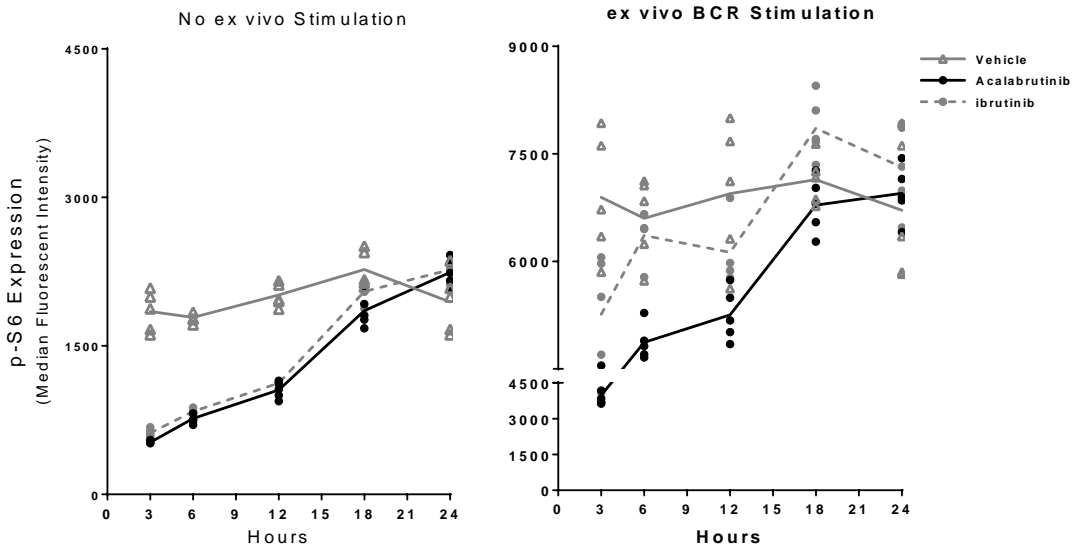

# Supplementary Figure S4

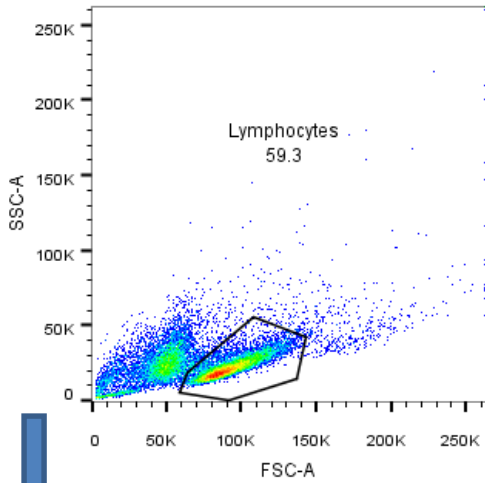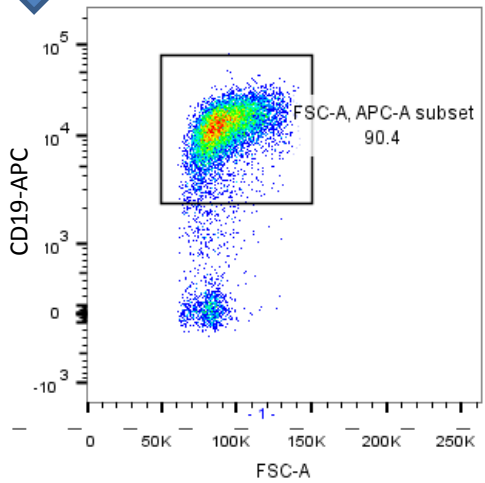

- Untreated
- anti-IgM
- ACALA + anti-IgM
- IB + anti-IgM

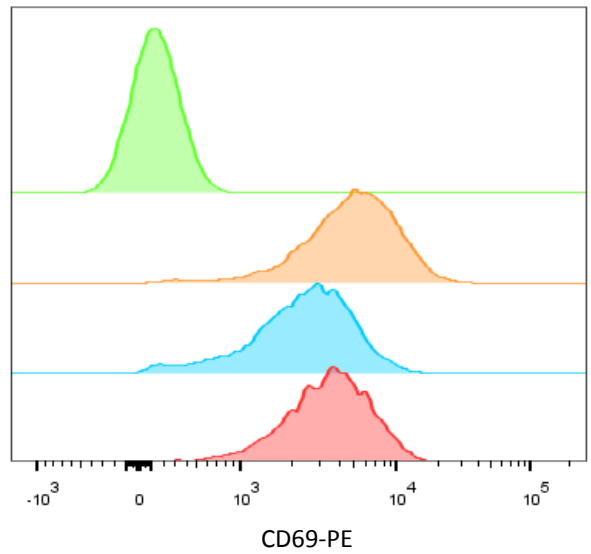

A

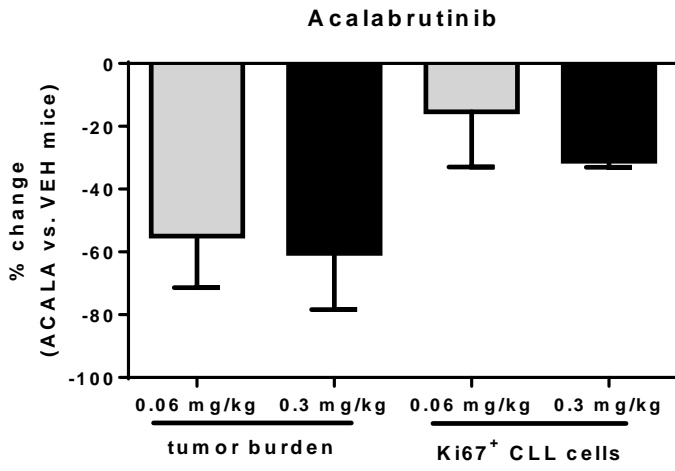

B

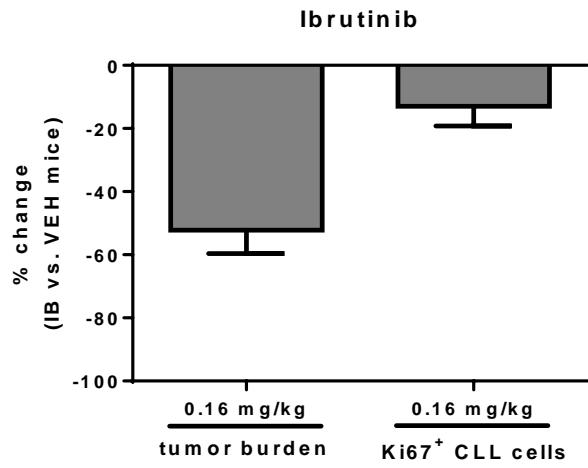

## SUPPLEMENTARY FIGURE LEGENDS

**Supplementary Figure S1: Acalabrutinib is a more potent BCR-inhibitor than ibrutinib *in vivo* at 1mg/kg and 3mg/kg.** Mice (5/group/dose) were orally given vehicle, acalabrutinib or ibrutinib. After 3 hours, spleens were extracted and splenocytes stimulated with anti-IgM for 18 h, followed by CD69 expression analysis by flow cytometry. Red dots represent 1mg/kg dose and blue dots represent 3mg/kg dose. Statistics were determined by unpaired student t-test.

**Supplementary Figure S2: *In vivo* gating strategy for murine cells.** Mice (5/group) received 25 mg/kg of vehicle, acalabrutinib or ibrutinib at time zero. Spleens were extracted at various time points and splenocytes stimulated with anti-IgM for 18 h. Live cells were gated out, followed by a lymphocytes gated on FSC and SSC. B-cells were identified as CD19+/CD3-. CD69 expression analysis was then performed on 7-AAD-/CD19+/CD3- cells. Representative histograms are shown.

**Supplementary Figure S3: *In vivo* acalabrutinib treatment inhibits BCR signal transduction similarly to ibrutinib.** Mice (5/group) received 25 mg/kg of vehicle, acalabrutinib or ibrutinib at time zero. Spleens were extracted at various time points and splenocytes stimulated with anti-IgM for 18 h, followed by CD86 expression analysis (A) and phospho-S6 expression analysis (B) by flow cytometry. Grey dots represent ibrutinib and black dots represent acalabrutinib.

**Supplementary Figure S4: *In vitro* gating strategy for patient MNCs.** CLL patient MNCs were pretreated with BCR-inhibitors for 3 hours and then stimulated with or without anti-IgM for 18 h, followed by CD69 expression analysis by flow cytometry. Lymphocytes were gated by FSC and SSC. CLL cells were identified as CD19+. CD69 expression analysis was then performed. Representative histograms are shown for untreated cells (green), anti-IgM stimulated cells (orange), acalabrutinib (ACAL) + anti-IgM (blue) and ibrutinib (IB) + anti-IgM (red).

**Supplementary Figure S5: Acalabrutinib demonstrates similar changes in proliferation and tumor burden in the CLL xenograft mouse model as ibrutinib.** Matched CLL MNCs (n=3) were used in separate but identical experiments comparing vehicle to 0.06mg/kg (light grey bars) and 0.3mg/kg (black bars) acalabrutinib (A) and vehicle to 0.16mg/kg (dark grey

bars) ibrutinib (B). MNCs were harvested from NSG mouse spleens (n=2-5 per patient/experiment) after 3 weeks of treatment. Shown is the % change in tumor burden (percentage of CLL cells among human CD45+ cells in the spleen) and proliferation (Ki67+ CLL cells) compared to experimental vehicle controls.
